# Supplementary material
Source: Royal Society of Chemistry journal article supplement (doi:10.1039/d6nj01113f)
Supplement: d6nj01113f1.pdf [file d6nj01113f1.pdf]

## **Amidoxime-Modified $\beta$ -Cyclodextrin-Based Microparticles for Ultrafast Selective Adsorption of Methylene Blue and Antibacterial Water Treatment**

Yinli Liu,\* Junjie Yang, Qianyi Yang, Xiaogang Yang\*

State Key Laboratory of Bio-based Fiber Materials, Zhejiang Sci-Tech University, Hangzhou 310018, China

\* Correspondence: [yliu@zstu.edu.cn](mailto:yliu@zstu.edu.cn) of [yxg@zstu.edu.cn](mailto:yxg@zstu.edu.cn)

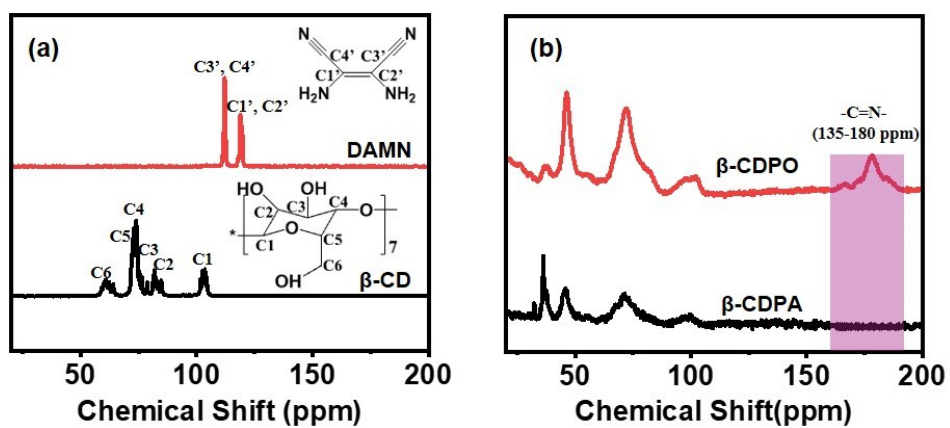

Figure S1 (a)  $^{13}\text{C}$  MAS solid-state NMR spectra of  $\beta$ -CD and DAMN, (b)  $^{13}\text{C}$  MAS solid-state NMR spectra of  $\beta$ -CDPA and  $\beta$ -CDPO.

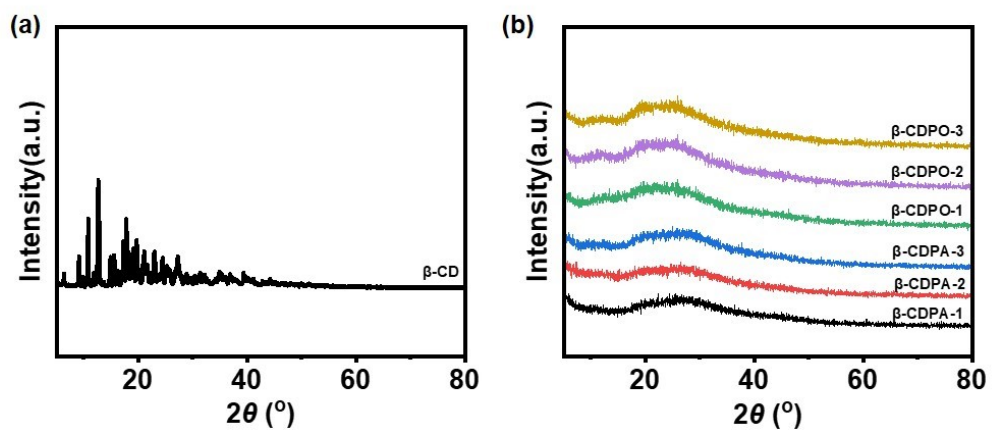

Figure S2. XRD patterns of  $\beta$ -CD (a) and  $\beta$ -CDPA-1,  $\beta$ -CDPA-2,  $\beta$ -CDPA-3,  $\beta$ -CDPO-1,  $\beta$ -CDPO-2 and  $\beta$ -CDPO-3 (b).

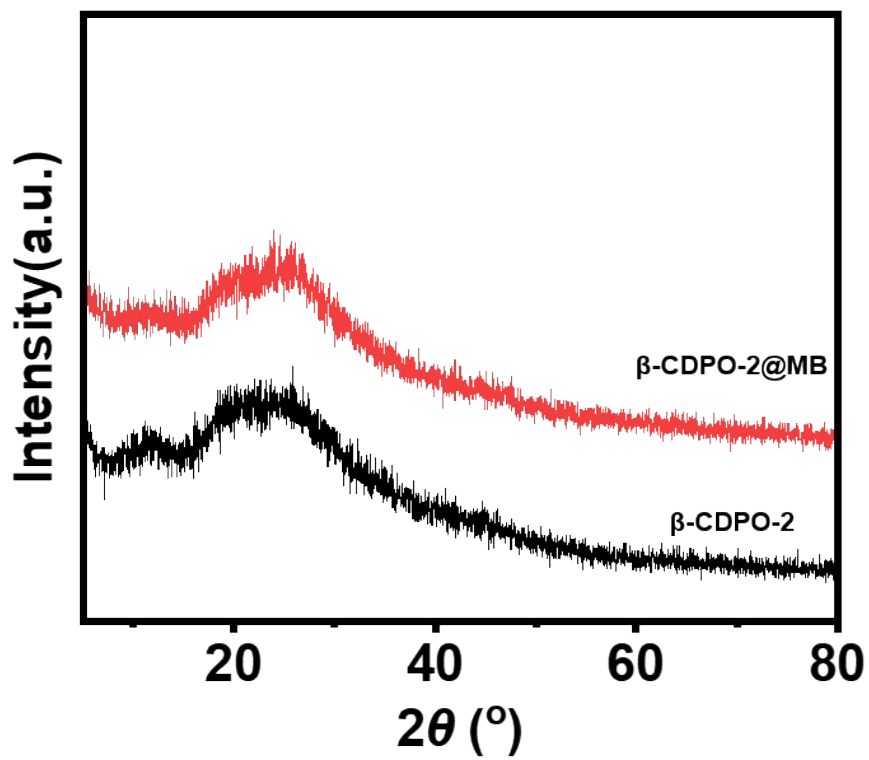

Figure S3. XRD patterns of  $\beta$ -CDPO-2 before and after MB adsorption.
